# Supplementary material
Source: PubMed Central journal article supplement (PMC7887848)
Supplement: pt0c00217_si_001.pdf [file pt0c00217_si_001.pdf]

# Supporting Information

## Extending the Calpain-Cathepsin Hypothesis to the Neurovasculature: Protection of Brain Endothelial Cells and Mice from Neurotrauma

Rachel C. Knopp<sup>1</sup>, Ammar Jastaniah<sup>1</sup>, Oleksii Dubrovskiy<sup>1</sup>, Irina Gaisina<sup>1,2</sup>, Leon Tai<sup>3</sup>, Gregory R.J. Thatcher<sup>4\*</sup>

<sup>1</sup>Department of Pharmaceutical Sciences, College of Pharmacy, University of Illinois at Chicago (UIC), Chicago, IL; <sup>2</sup>UICentre (Drug Discovery @ UIC), UIC; <sup>3</sup>Department of Anatomy and Cell Biology, College of Medicine, UIC, USA; <sup>4</sup>Department of Pharmacology & Toxicology, College of Pharmacy, University of Arizona, Tucson, AZ, USA

| Table of Contents                                                                                                                                                                                                                                       | Page      |
|---------------------------------------------------------------------------------------------------------------------------------------------------------------------------------------------------------------------------------------------------------|-----------|
| <b>Table S1. Selectivity profiles of compounds 1-5 at 1<math>\mu</math>M and 10<math>\mu</math>M against calpain-1 (CAPN1), cathepsin B (CTSB), cathepsin K (CTSK) and papain. Data represents Mean <math>\pm</math> SD of at least n=6 replicates.</b> | <b>S1</b> |
| <b>Table S2. Primers used in all rt-qPCR experiments</b>                                                                                                                                                                                                | <b>S1</b> |
| <b>Figure S1. Specific inhibitory efficacy of compounds <i>in vitro</i>. Fig. S4. Representative immunoblots of cellular ABCA1</b>                                                                                                                      | <b>S2</b> |
| <b>Figure S2. Sulforaphane is a positive and negative control in the OGD-R assay.</b>                                                                                                                                                                   | <b>S3</b> |
| <b>Figure S3. Male and female mice have no significant difference in WT or <i>ALDH2</i><sup>-/-</sup> BEC Experiments</b>                                                                                                                               | <b>S4</b> |
| <b>Figure S4. Minimal Transcriptional Changes of Tight Junction Proteins.</b>                                                                                                                                                                           | <b>S5</b> |

**Table S1.** Enzyme inhibition by compounds **1-5** at 1 $\mu$ M and 10 $\mu$ M against calpain-1 (CAPN1), cathepsin B (CTSB), cathepsin K (CTSK) and papain. Data represents Mean  $\pm$  SD of at least n=6 replicates.

|               | <b>1</b>         | <b>2</b>          | <b>3</b>          | <b>4</b>          | <b>5</b>         |
|---------------|------------------|-------------------|-------------------|-------------------|------------------|
| <b>CAPN1</b>  | 9.8 $\pm$ 5.62%  | 15.73 $\pm$ 3.35  | -7.1 $\pm$ 3.09%  | 14.8 $\pm$ 3.07%  | 3.3 $\pm$ 3.02%  |
| <b>CTSB</b>   | 87.6 $\pm$ 1.89% | 105.6 $\pm$ 9.73% | 88.6 $\pm$ 12.26% | 98.2 $\pm$ 5.38%  | 74.0 $\pm$ 9.54% |
| <b>CTSK</b>   | 92.6 $\pm$ 2.77% | 94.4 $\pm$ 12.52% | 86.5 $\pm$ 4.31%  | 91.7 $\pm$ 6.05%  | 89.6 $\pm$ 7.49% |
| <b>Papain</b> | 97.1 $\pm$ 9.58% | 100.2 $\pm$ 6.68% | 84.8 $\pm$ 5.45%  | 97.27 $\pm$ 14.6% | 91.7 $\pm$ 7.30% |
| <b>CAPN1</b>  | 0.78 $\pm$ 3.99% | 5.8 $\pm$ 6.68%   | 11.2 $\pm$ 4.65%  | -4.5 $\pm$ 2.1%   | -5.1 $\pm$ 2.93% |
| <b>CTSB</b>   | 41.4 $\pm$ 2.30% | 44.9 $\pm$ 4.8%   | 34.4 $\pm$ 3.14%  | 62.8 $\pm$ 6.05%  | 34.3 $\pm$ 4.18% |
| <b>CTSK</b>   | 48.2 $\pm$ 4.68% | 71.6 $\pm$ 2.80%  | 45.34 $\pm$ 1.19% | 76.6 $\pm$ 7.03%  | 50.4 $\pm$ 3.03% |
| <b>Papain</b> | 67.7 $\pm$ 5.13% | 84.4 $\pm$ 15.79% | 90.83 $\pm$ 16.6% | 99.6 $\pm$ 7.12%  | 72.8 $\pm$ 3.8%  |

Enzyme Activity (%)

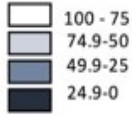

1 $\mu$ M

10 $\mu$ M

**Table S2.** Primers used in all rt-qPCR experiments

| Gene Symbol  | Gene Name                                       | UniGene ID | Product Number | Probe |
|--------------|-------------------------------------------------|------------|----------------|-------|
| <b>ACTB</b>  | Actin, beta                                     | Mm.328431  | Mm01205647_g1  | VIC   |
| <b>Cldn5</b> | Claudin 5                                       | Mm.22768   | Mm00727012_s1  | FAM   |
| <b>HPRT</b>  | Hypoxanthine guanine phosphoribosyl transferase | Mm.299381  | Mm03024075_m1  | VIC   |
| <b>Nos3</b>  | Nitric oxide synthase 3, endothelial cell       | Mm.258415  | Mm00435217_m1  | FAM   |
| <b>Ocln</b>  | Occludin                                        | Mm.4807    | Mm00500912_m1  | FAM   |
| <b>Tjp1</b>  | Tight Junction Protein 1 (ZO-1)                 | Mm.4342    | Mm01320638_m1  | FAM   |

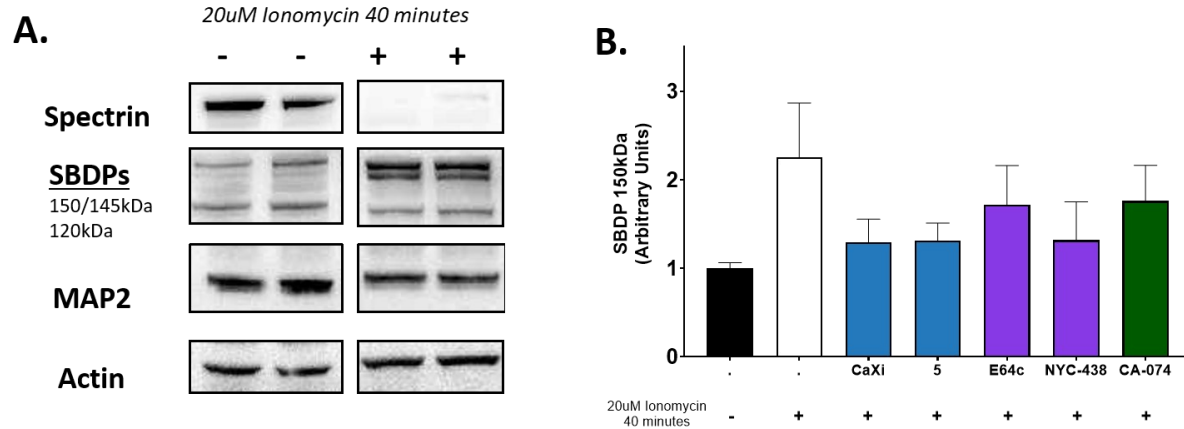

**Figure S1.** Inhibitory efficacy of compounds on proteolysis *in vitro*. **(A)** Representative immunoblot of HT22 cells treated for 40 minutes with 20 $\mu$ M ionomycin or vehicle control probed with Spectrin, MAP2 and Actin Abs. **(B)** Quantitative analysis of SBDP150kDa from western blots of HT22 cells treated with OGD-R and 10 $\mu$ M calpain/cathepsin inhibitors or vehicle control, compared to nontreated cells. Data represents mean  $\pm$  SEM of at least n=3 duplicates of cell passages. All protein was normalized to the housekeeping protein, actin. Equal protein amounts were loaded in all lanes of immunoblots.

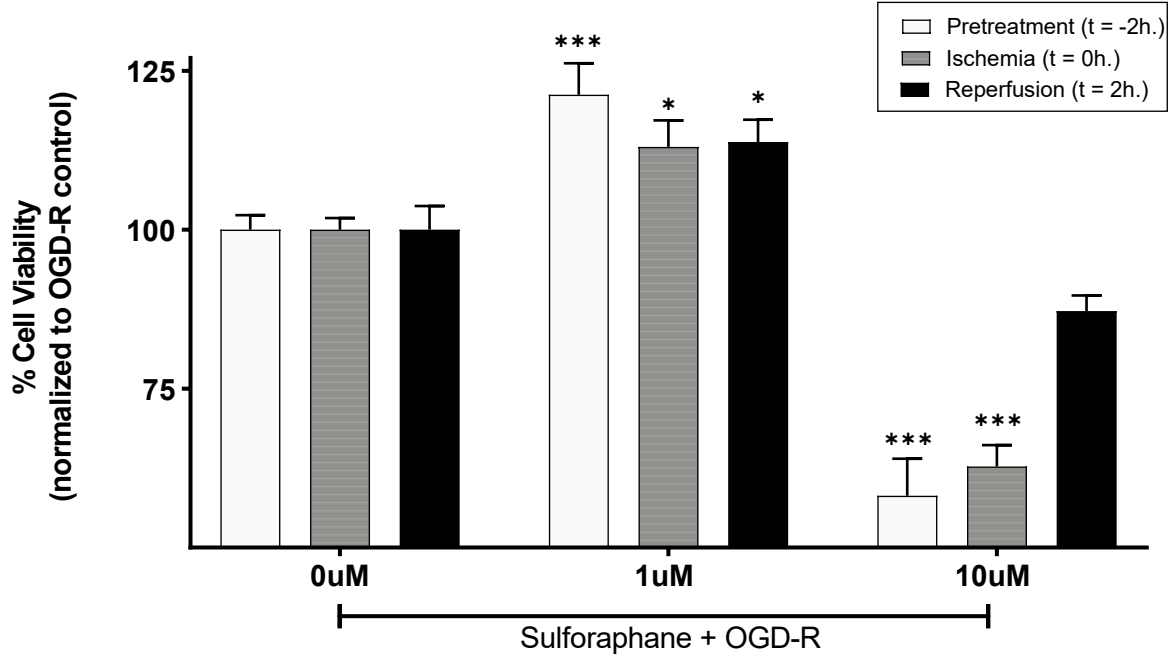

**Figure S2.** Sulforaphane is a positive and negative control in the OGD-R assay. OGD-R of SH-SY5Y cells treated with 1 or 10 μM at pre-treatment ( $t=-2h.$ ), ischemia ( $t=0h.$ ) or reperfusion ( $t=2h.$ ) treatment paradigms. Data represents mean  $\pm$  SEM of at least  $n=6$  replicates analyzed by one-way ANOVA with Dunnett's or Tukey's multi-comparison analysis

**A.**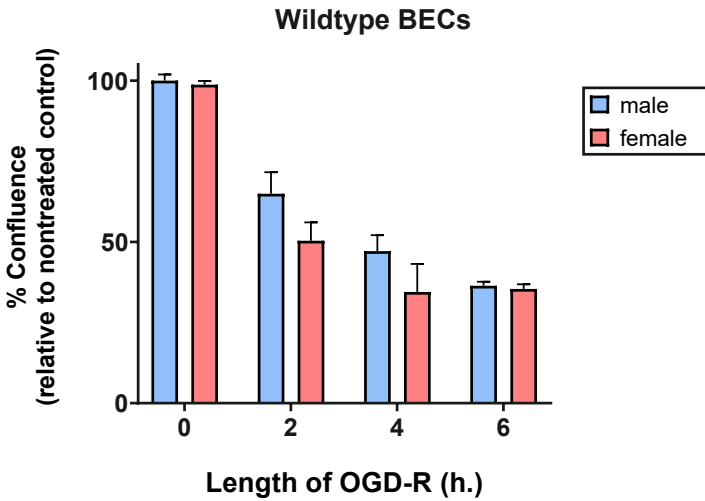**B.**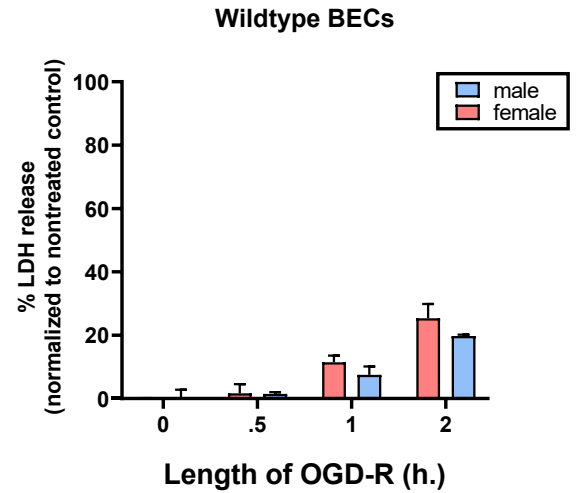**C.**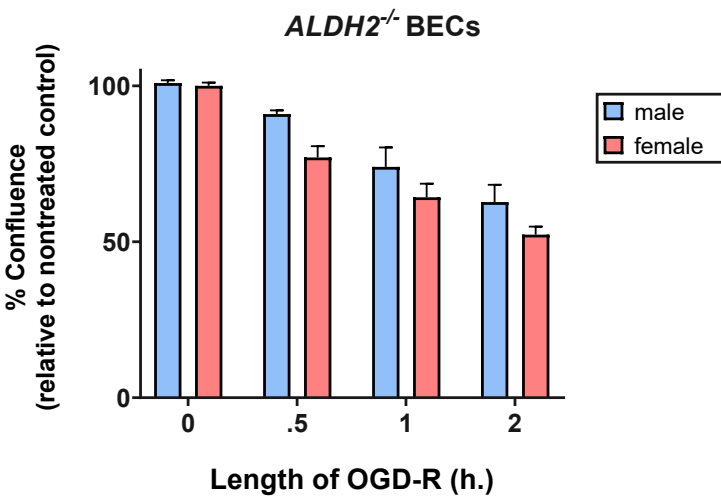**D.**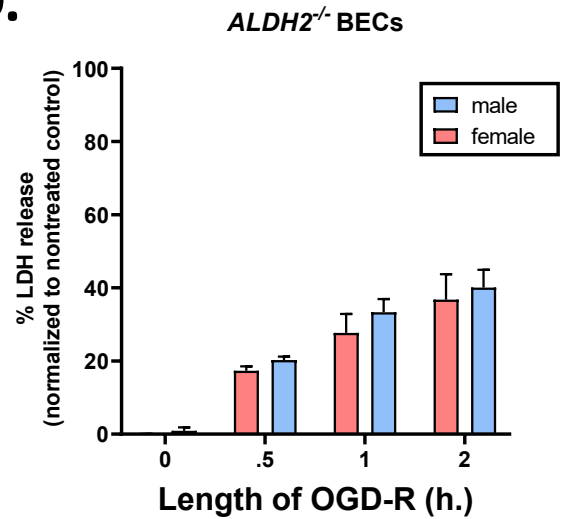

**Figure S3.** BECs from male and female mice show no significant sex difference in WT or *ALDH2*<sup>-/-</sup> BECs. **(A and B)** MTS and LDH, respectively of WT BECs isolated from female or male mice. **(C and D)** MTS and LDH, respectively, of *ALDH2*<sup>-/-</sup> BECs isolated from female or male mice. **(E and F)** Quantitative analysis of immunoblots probed with ZO-1 **(E)** or occludin **(F)** of WT or *ALDH2*<sup>-/-</sup> BECs isolated from female or male mice. Data represents mean  $\pm$  SEM of at least n=3 replicates in duplicates of cell passages. All protein was normalized to the housekeeping protein, actin. Equal protein amounts were loaded in all lanes.

**A.**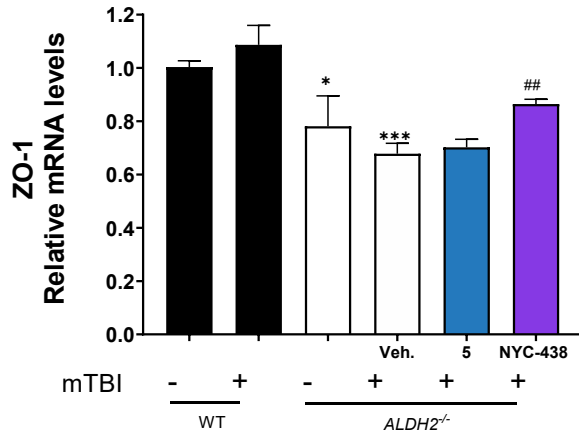**C.**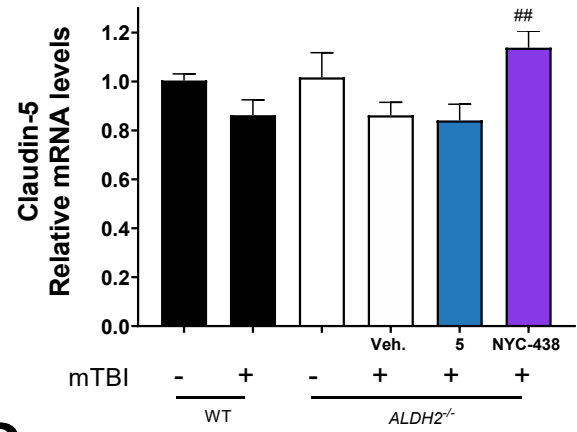**B.**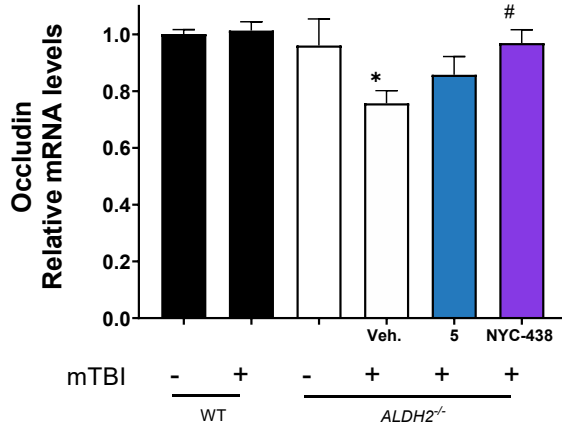**D.**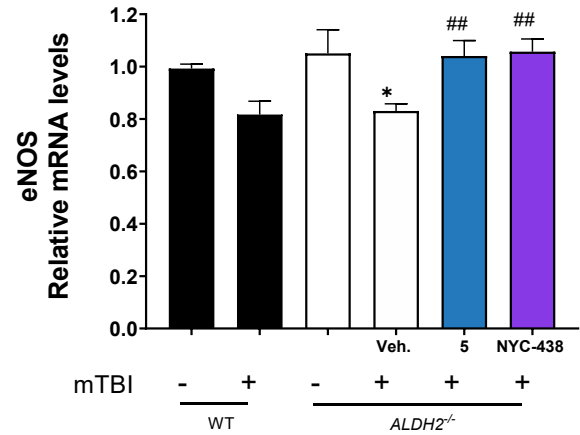

**Figure S4.** Minimal Transcriptional Changes of tight junction proteins. Levels of mRNA in ipsilateral hemispheres of WT and  $ALDH2^{-/-}$  24 hours post-mTBI or control animals with 10mg/kg i.p of **5** or **NYC-438**: mRNA levels of ZO-1 (**A**) Occludin (**B**), Claudin-5 (**C**), and eNOS (**D**) quantified by rt-qPCR. Data represents mean  $\pm$  SEM of n=7-10 animals analyzed by One-Way ANOVA with Tukey's multi-comparison analysis
